# Supplementary material
Source: PubMed Central journal article supplement (PMC2838236)
Supplement: NIHMS181929-supplement-Model_Equations_and_Glossary.pdf [file NIHMS181929-supplement-Model_Equations_and_Glossary.pdf]

## Appendix

## MODEL EQUATIONS

**Diffusion of compounds in the extracellular space**

FGF dimerization and soluble HSPG binding with FGF monomer and dimer are considered. Compounds represented in the following equations are VEGF, FGF, soluble HSPG, complex of FGF with soluble HSPG, FGF dimer, and complex of FGF dimer with soluble HSPG.

$$\frac{\partial V}{\partial t} = D_v \left( \frac{\partial^2 V}{\partial x^2} + \frac{\partial^2 V}{\partial y^2} \right)$$

$$\frac{\partial F}{\partial t} = D_F \left( \frac{\partial^2 F}{\partial x^2} + \frac{\partial^2 F}{\partial y^2} \right) - k_{onFh} F * h - k_{onF_2h} Fh * F - k_{onF_2} F * F + k_{offFh} Fh + 2 * k_{offF_2} F_2$$

$$\frac{\partial h}{\partial t} = D_h \left( \frac{\partial^2 h}{\partial x^2} + \frac{\partial^2 h}{\partial y^2} \right) - k_{onFh} F * h - k_{onF_2h} F_2 * h + k_{offFh} Fh$$

$$\frac{\partial Fh}{\partial t} = D_{Fh} \left( \frac{\partial^2 Fh}{\partial x^2} + \frac{\partial^2 Fh}{\partial y^2} \right) + k_{onFh} F * h - k_{offFh} Fh - k_{onF_2h} Fh * F$$

$$\frac{\partial F_2}{\partial t} = D_{F_2} \left( \frac{\partial^2 F_2}{\partial x^2} + \frac{\partial^2 F_2}{\partial y^2} \right) + k_{onF_2} F * F - k_{offF_2} F_2 - k_{onF_2h} F_2 * h$$

$$\frac{\partial F_2h}{\partial t} = D_{F_2h} \left( \frac{\partial^2 F_2h}{\partial x^2} + \frac{\partial^2 F_2h}{\partial y^2} \right) + k_{onF_2h} Fh * F + k_{onF_2h} F_2 * h$$

**Binding of FGF and VEGF to cell surface receptors**

$$- D_v \left. \frac{\partial V}{\partial y} \right|_{y=0} = k_{onVR} R_V * V - k_{offVR} B_{VR}$$

$$-D_F \left. \frac{\partial F}{\partial y} \right|_{y=0} = k_{onFR} R_F * F + k_{onFH} F * H + k_{onFFHR} B_{FHR} * F + k_{onFFhR} B_{FhR} * F$$

$$-k_{offFR} B_{FR} - k_{offFH} B_{FH} - k_{offFHR} B_{FHR}$$

$$-D_{Fh} \left. \frac{\partial Fh}{\partial y} \right|_{y=0} = k_{onFhR} Fh * R_F - k_{offFhR} B_{FhR}$$

$$-D_{F_2} \left. \frac{\partial F_2}{\partial y} \right|_{y=0} = k_{onF_2R} F_2 * R_F + k_{onF_2H} F_2 * H - k_{offF_2R} B_{F_2R}$$

$$-D_{F_2h} \left. \frac{\partial F_2h}{\partial y} \right|_{y=0} = k_{onFFhR} F_2h * R_F$$

### Concentration change of complex on cell surface

Various complexes are formed by binding of the compounds in the extracellular space with corresponding receptors, and HSPGs on cell-surface.

$$\frac{\partial R_V}{\partial t} = S_V - k_{inVR} R_{VR} - k_{onVR} V * R_V + k_{offVR} B_{VR}$$

$$\frac{\partial B_{VR}}{\partial t} = S_{VR} - k_{inVR} B_{VR} + k_{onVR} V * R_V - k_{offVR} B_{VR}$$

$$\begin{aligned} \frac{\partial R_F}{\partial t} = & S_F - k_{inFR} R_F - k_{onFR} F * R_F - k_{onFhR} Fh * R_F - k_{onFHR} B_{FH} * R_F - k_{onFFhR} B_{F_2h} * R_F \\ & - k_{onF_2R} F_2 * R_F - k_{onFFHR} B_{F_2H} * R_F + k_{offFR} B_{FR} + k_{offFHR} B_{FHR} + k_{offF_2R} B_{FHR} + k_{offF_2R} B_{F_2R} \end{aligned}$$

$$\begin{aligned} \frac{\partial H}{\partial t} = & S_H - k_{inH} H - k_{onFH} F * H - k_{onFHR} B_{FR} * H - k_{onF_2H} F_2 * H - k_{onFFHR} B_{F_2R} * H \\ & + k_{offFH} B_{FH} + k_{offFHR} B_{FHR} \end{aligned}$$

$$\frac{\partial B_{FR}}{\partial t} = -k_{inFR} B_{FR} + k_{onFR} F * R_F - k_{onFHR} B_{FR} * H - k_{offFR} B_{FR}$$

$$\frac{\partial B_{FH}}{\partial t} = -k_{inFH} B_{FH} + k_{onFH} F * H - k_{onFHR} B_{FH} * R_F - k_{offFH} B_{FH}$$

$$\frac{\partial B_{FHR}}{\partial t} = -k_{inFHR} B_{FHR} + k_{onFHR} B_{FH} * R_F + k_{onFHR} B_{FR} * H - k_{offFHR} B_{FHR} - k_{onFFHR} B_{FHR} * F$$

$$\frac{\partial B_{FhR}}{\partial t} = -k_{inFhR} B_{FhR} + k_{onFhR} B_{Fh} * R_F - k_{offFhR} B_{FhR} * H - k_{onFFhR} B_{FhR} * F$$

$$\frac{\partial B_{FFHR}}{\partial t} = -k_{inFFHR} B_{FFHR} + k_{onFFHR} B_{FHR} * F + k_{onFFHR} B_{F_2H} * R_F + k_{onFFHR} B_{F_2R} * H$$

$$\frac{\partial B_{FFhR}}{\partial t} = -k_{inFFhR} B_{FFhR} + k_{onFFhR} B_{FhR} * F + k_{onFFhR} B_{F_2h} * R_F$$

$$\frac{\partial B_{F_2R}}{\partial t} = -k_{inF_2R} B_{F_2R} + k_{onF_2R} F_2 * R_F - k_{offF_2R} B_{F_2R} - k_{onFFHR} B_{F_2R} * H$$

$$\frac{\partial B_{F_2H}}{\partial t} = -k_{inF_2H} B_{F_2H} + k_{onF_2H} F_2 * H - k_{onFFHR} B_{F_2H} * R_F$$

### Intracellular concentration change of calcium and IP<sub>3</sub>

Calcium transport events include IP<sub>3</sub> generation, calcium uptake into the ER, influx and leak of calcium across cell plasma membrane.

$$\frac{\partial I}{\partial t} = J_B + J_P - k_3 I + D_I \frac{\partial^2 I}{\partial x^2}$$

$$J_B = k_1 (B_{VR} + B_{FR} + B_{FHR} + B_{FFHR} + B_{F_2R} + B_{FhR} + B_{FFhR}) * \left( \frac{C_a}{C_a + K_1} \right)$$

$$J_P = k_2 \frac{C_a^2}{K_2^2 + C_a^2}$$

$$\frac{\partial C_a}{\partial t} = J_{REL} - J_{IER} + J_{IN} - J_{OUT} + D_C \frac{\partial^2 C_a}{\partial x^2}$$

$$J_{REL} = \left[ k_4 + k_5 \frac{RC_a^2 I^2}{(K_5^2 + C_a^2)(K_i^2 + I^2)} \right] (C_{ER} - C_a)$$

$$J_{IER} = k_6 C_a, \quad J_{IN} = k_7 + k_8 * \frac{I^2}{K_8^2 + I^2}, \quad J_{OUT} = k_9 C_a$$

$$\frac{\partial C_{ER}}{\partial t} = r(J_{IER} - J_{REL})$$

$$\frac{\partial R}{\partial t} = k_{10} \left[ \frac{K_{10}^2}{K_{10}^2 + C_a^2} - R \right]$$

### Glossary

|            |                                                         |
|------------|---------------------------------------------------------|
| $B_{F2h}$  | Concentration of FGF dimer-soluble HSPG on cell surface |
| $B_{F2H}$  | Concentration of FGF dimer-HSPG                         |
| $B_{F2R}$  | Concentration of FGF dimer-FGFR1                        |
| $B_{FFhR}$ | Concentration of FGF dimer-soluble HSPG-FGFR1           |
| $B_{FFHR}$ | Concentration of FGF dimer-HSPG-FGFR1                   |
| $B_{Fh}$   | Concentration of FGF-soluble HSPG on cell surface       |
| $B_{FH}$   | Concentration of FGF-HSPG on cell surface               |
| $B_{FhR}$  | Concentration of FGF-soluble HSPG-FGFR1                 |
| $B_{FHR}$  | Concentration of FGF-HSPG-FGFR1                         |
| $B_{FR}$   | Concentration of FGF-FGFR1                              |
| $B_{VR}$   | Concentrations of VEGF-VEGFR2                           |
| $C_a$      | Concentrations of calcium in cytoplasm                  |
| $C_{ER}$   | Concentrations of calcium in ER                         |
| $C_{ER0}$  | The initial concentrations of calcium in ER             |
| $D_F$      | Diffusivity of FGF monomer                              |
| $D_{F2}$   | Diffusivity of FGF dimer                                |

|           |                                                                             |
|-----------|-----------------------------------------------------------------------------|
| $D_{F2h}$ | Diffusivity of FGF dimer-soluble HSPG                                       |
| $D_h$     | Diffusivity of soluble HSPG                                                 |
| $D_{Fh}$  | Diffusivity of FGF-soluble HSPG                                             |
| $D_V$     | Diffusivity of VEGF                                                         |
| $D_C$     | Diffusivity of calcium                                                      |
| $D_I$     | Diffusivity of $IP_3$                                                       |
| $F$       | Concentrations of FGF                                                       |
| $F_0$     | The initial concentrations of FGF                                           |
| $F_2$     | Concentration of FGF dimer                                                  |
| $F_{2h}$  | Concentration of FGF dimer-soluble HSPG                                     |
| $F_h$     | Concentration of FGF-soluble HSPG                                           |
| $h$       | Concentration of soluble HSPG                                               |
| $h_0$     | The initial concentration of soluble HSPG                                   |
| $H$       | Concentration of cell-surface HSPG                                          |
| $H_0$     | The initial concentration of cell-surface HSPG                              |
| $J_B$     | The rate of $IP_3$ generation by cell-surface complexes through $PLC\gamma$ |
| $J_{IER}$ | Calcium pumping into the ER                                                 |
| $J_{IN}$  | Calcium influx across the plasma membrane                                   |
| $J_{OUT}$ | Calcium extrusion                                                           |
| $J_P$     | The rate of $IP_3$ generation by the positive feedback through $PLC\delta$  |
| $J_{REL}$ | Calcium released from the ER                                                |
| $k_1$     | $IP_3$ generation rate                                                      |
| $k_2$     | Maximal rate of $PLC\delta$                                                 |

|              |                                                                              |
|--------------|------------------------------------------------------------------------------|
| $k_3$        | IP <sub>3</sub> degradation rate                                             |
| $k_4$        | Rate of calcium leak from ER                                                 |
| $k_5$        | Rate constant of calcium release through IP <sub>3</sub> R                   |
| $k_6$        | Rate constant of SERCA pump                                                  |
| $k_7$        | Rate of calcium leak across the plasma membrane                              |
| $k_8$        | Maximal rate of activation-dependent calcium influx                          |
| $k_9$        | Rate constant of calcium extrusion                                           |
| $k_{10}$     | Rate constant of IP <sub>3</sub> R inactivation                              |
| $K_1$        | Dissociation constant between calcium and PLC $\gamma$                       |
| $K_2$        | Half-saturation constant for calcium activation of PLC $\delta$              |
| $K_5$        | Half-saturation constant for calcium activation of IP <sub>3</sub> R         |
| $K_i$        | Half-saturation constant for IP <sub>3</sub> activation of IP <sub>3</sub> R |
| $K_8$        | Half-saturation constant for agonist-dependent calcium entry                 |
| $K_{10}$     | Half-saturation constant for calcium inhibition of IP <sub>3</sub> R         |
| $k_{inF}$    | Internalization rate of FGFR1                                                |
| $k_{inFH}$   | Internalization rate of FGF-HSPG                                             |
| $k_{inFhR}$  | Internalization rate of FGF-soluble HSPG-FGFR1                               |
| $k_{inFHR}$  | Internalization rate of FGF-HSPG-FGFR1                                       |
| $k_{inFFhR}$ | Internalization rate of FGF dimer-soluble HSPG-FGFR1                         |
| $k_{inFFHR}$ | Internalization rate of FGF dimer-HSPG-FGFR1                                 |
| $k_{inF2R}$  | Internalization rate of FGF dimer                                            |
| $k_{inF2H}$  | Internalization rate of FGF dimer-HSPG                                       |
| $k_{inH}$    | Internalization rate of HSPG                                                 |

|              |                                                      |
|--------------|------------------------------------------------------|
| $k_{inV}$    | Internalization rate of VEGF                         |
| $k_{inFR}$   | Internalization rate of FGF-FGFR1                    |
| $k_{inVR}$   | Internalization rate of VEGF-VEGFR2                  |
| $k_{offFR}$  | Dissociation rate of FGF-FGFR1                       |
| $k_{offF2}$  | Dissociation rate of FGF dimer                       |
| $k_{offF2R}$ | Dissociation rate of FGF dimer-FGFR1                 |
| $k_{offFh}$  | Dissociation rate of FGF -soluble HSPG               |
| $k_{offFH}$  | Dissociation rate of FGF-HSPG                        |
| $k_{offFhR}$ | Dissociation rate of FGF-soluble HSPG-FGFR1          |
| $k_{offFHR}$ | Dissociation rate of FGF-HSPG-FGFR1                  |
| $k_{offVR}$  | Dissociation rate of VEGF-VEGFR2                     |
| $k_{onFR}$   | Kinetic rate of FGF binding FGFR1                    |
| $k_{onF2}$   | Kinetic rate of FGF binding FGF                      |
| $k_{onF2R}$  | Kinetic rate of FGF dimer binding FGFR1              |
| $k_{onF2h}$  | Kinetic rate of FGF dimer binding soluble HSPG       |
| $k_{onF2H}$  | Kinetic rate of FGF dimer binding HSPG               |
| $k_{onFh}$   | Kinetic rate of FGF binding soluble HSPG             |
| $k_{onFH}$   | Kinetic rate of FGF binding HSPG                     |
| $k_{onFhR}$  | Kinetic rate of FGF-soluble HSPG binding FGFR1       |
| $k_{onFHR}$  | Kinetic rate of FGF-HSPG binding FGFR1               |
| $k_{onFFhR}$ | Kinetic rate of FGF dimer-soluble HSPG binding FGFR1 |
| $k_{onFFHR}$ | Kinetic rate of FGF dimer-HSPG binding FGFR1         |
| $k_{onV}$    | Kinetic rate of VEGF binding VEGFR2                  |

|          |                                                  |
|----------|--------------------------------------------------|
| $P_C$    | Permeability of calcium to gap junctions         |
| $P_I$    | Permeability of IP <sub>3</sub> to gap junctions |
| $r$      | Ratio of the volume between cytoplasmic and ER   |
| $R$      | Fraction of IP <sub>3</sub> R                    |
| $R_F$    | Concentrations of FGFR1                          |
| $R_{F0}$ | The initial concentration of FGFR1               |
| $R_V$    | Concentrations of VEGFR2                         |
| $R_{V0}$ | The initial concentrations of VEGFR2             |
| $S_F$    | Insertion rates of FGF                           |
| $S_H$    | Insertion rates of HSPG                          |
| $S_V$    | Insertion rates of VEGFR2                        |
| $V$      | Concentrations of VEGF                           |
| $V_0$    | The initial concentration of VEGF                |
